# Supplementary material
Source: PubMed Central journal article supplement (PMC2897150)
Supplement: NIHMS206506-supplement-02.pdf [file NIHMS206506-supplement-02.pdf]

**Table 1. miRNAs that are differentially expressed at the 5% significance level according to both hypergeometric test and paired t-test.**

**Up-regulated miRNAs**

| <b>Hypergeometric test p-value</b> | <b>t-test p-value</b> | <b>miRNA</b>   |
|------------------------------------|-----------------------|----------------|
| 3.76E-006                          | 8.61E-003             | hsa-miR-34c    |
| 1.51E-005                          | 6.29E-003             | hsa-miR-17-3p  |
| 6.10E-005                          | 1.17E-003             | hsa-miR-324-3p |
| 9.81E-005                          | 2.03E-004             | hsa-miR-338    |
| 1.69E-004                          | 1.06E-002             | hsa-miR-107    |
| 1.85E-004                          | 3.25E-002             | hsa-miR-214    |
| 2.16E-004                          | 7.41E-003             | hsa-miR-339    |
| 4.48E-004                          | 2.08E-002             | hsa-miR-526b   |
| 2.42E-003                          | 1.26E-003             | hsa-let-7c     |
| 3.16E-003                          | 3.30E-002             | hsa-miR-223    |
| 3.28E-003                          | 3.23E-002             | hsa-miR-585    |
| 1.67E-002                          | 4.89E-003             | hsa-miR-342    |
| 1.79E-002                          | 2.05E-002             | hsa-miR-211    |
| 1.81E-002                          | 2.56E-002             | hsa-miR-324-5p |
| 2.60E-002                          | 5.71E-003             | hsa-miR-425-5p |

**Down-regulated miRNAs**

| <b>Hypergeometric test p-value</b> | <b>t-test p-value</b> | <b>miRNA</b> |
|------------------------------------|-----------------------|--------------|
| 7.45E-004                          | 4.15E-003             | hsa-miR-642  |
| 1.06E-003                          | 6.08E-005             | hsa-miR-508  |
| 1.56E-003                          | 1.91E-002             | hsa-miR-505  |
| 2.68E-003                          | 2.29E-003             | hsa-miR-509  |
| 3.90E-003                          | 9.28E-004             | hsa-miR-133b |
| 3.99E-003                          | 3.10E-003             | hsa-miR-99a  |
| 5.64E-003                          | 1.77E-002             | hsa-miR-181c |
| 9.09E-003                          | 4.01E-003             | hsa-miR-23a  |
| 1.06E-002                          | 8.91E-003             | hsa-miR-100  |
| 1.07E-002                          | 5.01E-004             | hsa-miR-222  |
| 1.18E-002                          | 2.00E-002             | hsa-miR-31   |
| 1.39E-002                          | 3.18E-002             | hsa-miR-145  |
| 2.80E-002                          | 3.31E-002             | hsa-miR-125b |
| 3.71E-002                          | 4.41E-002             | hsa-miR-379  |
| 4.17E-002                          | 8.19E-003             | hsa-miR-330  |

**Table 2. Sequence data for DNA oligonucleotides used in these studies.**

| <b>DNA oligo nucleotide</b> | <b>sequence</b> |                                    |
|-----------------------------|-----------------|------------------------------------|
| ACTIN                       | Forward         | 5' ATGCCCACAGGATGCAGAA 3'          |
|                             | Reverse         | 5' GCTGATCCACATCTGCTGGAA 3'        |
| m-MITF                      | Forward         | 5' CATTGTTATGCTGGAAATGCTAGA 3'     |
|                             | Reverse         | 5' GGCTTGCTGTATGTGGTACTTGG 3'      |
| DICER ex1-ex2               | Forward         | 5' GGTCCGATGGTTCTCGAAGGC 3'        |
|                             | Reverse         | 5' GGGTTGCAAAGCAGGGCT 3'           |
| DICER ex1-int1              | Forward         | 5' GGGTCCGATGGTTCTCGAAGGC 3'       |
|                             | Reverse         | 5' CCCGGACACAAAGCTGCTC 3'          |
| DICER ex3-ex4               | Forward         | 5' GGGAGACTTCAGCAGAAATGGAA 3'      |
|                             | Reverse         | 5' CTGACAGCTGACACTTGTGAGCA 3'      |
| DICERshort ex2-ex3          | Forward         | 5' GCAGTTCAGACAAGAGCAACACAG 3'     |
|                             | Reverse         | 5' GGGTTGCAAAGCAGGGCT 3'           |
| hDAC1                       | Forward         | 5' ACATGTCCGAGTACAGCAAGCAGA 3'     |
|                             | Reverse         | 5' TGACAGAACTCAAACAGGCCATCG 3'     |
| DICER promoter              | Forward         | 5' CACAGGCATGCAAGCCCTAGATC 3'      |
|                             | Reverse         | 5' GTGTGCTCACAGCAACTGCAACCG 3'     |
| Tyrosinase promoter         | Forward         | 5' GTGGGATACGAGCCAATTCGAAAG 3'     |
|                             | Reverse         | 5' TCCACCTCCAGCATCAAACACTT 3'      |
| ACTIN negative control ChIP | Forward         | 5' CATCCTCACCTGAAGTACCC 3'         |
|                             | Reverse         | 5' TAGAAGGTGTGGTGCCAGATT 3'        |
| pre-miRNA-211               | Forward         | 5' TTGTGGGCTTCCCTTTGTCATCCT 3'     |
|                             | Reverse         | 5' TGCTGTGGGAAGTGACAACCTGA 3'      |
| pre-miRNA-92a               | Forward         | 5' TTCTACACAGGTTGGGATCGGTTG 3'     |
|                             | Reverse         | 5' CCGGGACAAGTGCAATACCATACAGA 3'   |
| pre-miRNA-17                | Forward         | 5' AGTGCTTACAGTGCAGGTAGTG 3'       |
|                             | Reverse         | 5' GTCACCATAATGCTACAAGTGCC 3'      |
| pre-miRNA-34c               | Forward         | 5' CTAGGCAGTGTAGTTAGCTG 3'         |
|                             | Reverse         | 5' TTTACCTGGCCGTGTGGTTA 3'         |
| pre-miRNA-107               | Forward         | 5' CTGCTTTCAGCTTCTTTACAGTGTGGCC 3' |
|                             | Reverse         | 5' CCTGTACAATGCTGCTTGAACCTCC 3'    |
| pre-miRNA-214               | Forward         | 5' TGGCTGGACAGAGTTGTCAT 3'         |
|                             | Probe           | 5' ACTTGCTGTGCAGAACATCCGCT 3'      |
|                             | Reverse         | 5' TCATGTGACTGCCTGTCTGT 3'         |
| pre-miRNA-324               | Forward         | 5' CTGACTATGCCTCCC 3'              |
|                             | Probe           | 5' ATGGTGTAAGCTGGAGACCCACTG 3'     |
|                             | Reverse         | 5' CCCAGCAGCACCT 3'                |
| pre-let7c                   | Forward         | 5' CCGGGTTGAGGTAGTAGTTGTAT 3'      |
|                             | Reverse         | 5' GGTGTACAGTAACTCCCAGGGT 3'       |
| pre-miRNA-425-5p            | Forward         | 5' GCGCTTTGGAATGACACGATCACT 3'     |
|                             | Reverse         | 5' AAAGAGCACTGGGCGGACACGACATT 3'   |
| pre-miRNA-223               | Forward         | 5' ACGCTCCGTGTATTTGACAAGCTG 3'     |
|                             | Probe           | 5' TGGACACTCCATGTGGTAGAGTGCA 3'    |
|                             | Reverse         | 5' CTGGTAAGCATGTGCCGC 3'           |
| pre-miRNA-342               | Forward         | 5' AAAGTGGGCTCAAGGTGAGGG 3'        |
|                             | Probe           | 5' GTGCTATCTGTGATTGAGGGACATGGTT 3' |
|                             | Reverse         | 5' GGGTGGGATTTCTGTGTGAGACAA 3'     |
| pre-miRNA-338               | Forward         | 5' CCAACAATATCCTGGTGCTGAGTG 3'     |
|                             | Reverse         | 5' AAATCACTGATGCTGGAGTCGC 3'       |
| pre-miRNA-339               | Forward         | 5' CGCTCTCCCTGTCCTCCA 3'           |
|                             | Probe           | 5' TCACGTGTGCCCTGCCTGTGA 3'        |
|                             | Reverse         | 5' CTCTGTGCTCGAGGCG 3'             |

|                                |                                  |                                      |
|--------------------------------|----------------------------------|--------------------------------------|
| pre-miRNA-585                  | Forward                          | 5' TATGGCAGCCCTAGCACACAGATA 3'       |
|                                | Probe                            | 5' AGAGAAAGCCTGAACGTTGGGCGTAT 3'     |
|                                | Reverse                          | 5' TTGTTACAGCAGCCCTAGCATACA 3'       |
| pre-miRNA-526b                 | Forward                          | 5' CAGGCTGTGACCCTCTT 3'              |
|                                | Probe                            | 5' GAGGGAAGCACTTTCTGTTGTCTGAAAGA 3'  |
|                                | Reverse                          | 5' TCAGACAGTAAGCCTCTAAA 3'           |
| pri-miRNA-18a                  | Forward                          | 5' AGGTGCATCTAGTGCAGATAGTGA 3'       |
|                                | Reverse                          | 5' TTATGCCAGAAGGAGCACTTAGGG 3'       |
| pri-miRNA-19a                  | Forward                          | 5' GCATAGTTGCACTACAAGAAGAATGT 3'     |
|                                | Reverse                          | 5' TCATTTGAAGGAAATAAGCAGGCCACC 3'    |
| pri-miRNA-20a                  | Forward                          | 5' AGTGCTTATAGTGCAGGTAGTGT 3'        |
|                                | Reverse                          | 5' GCCGAAGCTGGAGTTCTAC 3'            |
| pri-miRNA-19b                  | Forward                          | 5' GCATAGTTGCACTACAAGAAGAATGT 3'     |
|                                | Reverse                          | 5' CCGGGACAAGTGCAATACCATACAGA 3'     |
| beta-2-microglobulin (B2M)     | purchases from Abi cat# 4333766F |                                      |
| Xerodermia pigmentosa C (XPC)  | Forward                          | 5' ACAGCCTACCCAGGGGATGTGATGCTTCCT 3' |
|                                | Reverse                          | 5' TGGTCTGTGGACAGAGAACACTGGCTGTGC 3' |
| Dicer floxed allele*           | Forward                          | 5' CCTGACAGTGACGGTCCAAAG 3'          |
| Dicer floxed deletion allele * | Reverse                          | 5' CCTGAGCAAGGCAAGTCATTC 3'          |

ex exon  
int intron

\* Harfe DB, et al PNAS 2005

**Table 3. Sequence data and manufacturers for RNA oligonucleotides used in these studies.**

| reagenU              | sequence  | company                       |
|----------------------|-----------|-------------------------------|
| si control           | sense     | 5' AAUUCUCCGAACGUGUCACGU 3'   |
|                      | antisense | 5' ACGUGACACGUUCGGAGAAUU 3'   |
| miR-211 mimic        | sense     | 5' GCGAAGGAUGACAAAGGGAAUU 3'  |
|                      | antisense | 5' UUCCCUUUGUCAUCCUUCGCCU 3'  |
| miR-107 mimic        | sense     | 5' AGCAGCAUUGUACAGGGCUAUCA 3' |
|                      | antisense | 5' UGAUAGCCCUGUACAAUGCUGCU 3' |
| miR-17-3p mimic      | sense     | 5' ACUGCAGUGAAGGCACUUGUAG 3'  |
|                      | antisense | 5' CUACAAGUGCCUUCACUGCAGU 3'  |
| miR-92a mimic        | sense     | 5' UAUUGCACUUGUCCCGGCCUGU 3'  |
|                      | antisense | 5' ACAGGCCGGGACAAGUGCAAUA 3'  |
| si BIM (SMARTpool)   | sense     | 5' CCGAGAAGGUAGACAAUUG 3'     |
|                      | antisense | 5' CAAUUGUCUACCUUCUCGG 3'     |
|                      | sense     | 5' UGAUGUAAGUUCUGAGUGU 3'     |
|                      | antisense | 5' ACACUCAGAACUUACAUCA 3'     |
|                      | sense     | 5' AUGUAAGUUCUGAGUGUGA 3'     |
|                      | antisense | 5' UCACACUCAGAACUUACA 3'      |
|                      | sense     | 5' GUUCUGAGUGUGACCGAGA 3'     |
|                      | antisense | 5' UCUCGGUCACACUCAGAAC 3'     |
| si MITF #1           | sense     | 5' GGCUUUCUAGAAAGAAUAA 3'     |
|                      | antisense | 5' UUAUUCUUUCUAGAAAGCC 3'     |
| si MITF #2           | sense     | 5' GGUGAAUCGGAUCAUCAAG 3'     |
|                      | antisense | 5' CUUGAUGAUCCGAUUCACC 3'     |
| si DICER #1          | sense     | 5' CAGCAUACUUUAUCGCCUtt 3'    |
|                      | antisense | 5' AAGGCGAUAAAGUAUGCUGgg 3'   |
| si DICER #2          | sense     | 5' GAUCCUAUGUUCAAUUCUAAtt 3'  |
|                      | antisense | 5' UUAGAUUGAACAUAGGAUCga 3'   |
| miR negative control | sense     | 5' AGUACUGCUUACGAUACGGUU 3'   |
|                      | antisense | 5' CCGUAUCGUAAGCAGUACUUU 3'   |

\* designed by Carreira et al, *Nature* 2005 and purchased from ABI Inc.
